# Supplementary material for: Modifying the organic/metal interfaceviasolvent vapor annealing to enhance the performance of blue OLEDs
Source: Royal Society of Chemistry journal article supplement (doi:10.1039/c9tc01092k), 2019-01-01
Supplement: c9tc01092k1.pdf [file c9tc01092k1.pdf]

## Supporting Information

### **Modifying organic/metal interface via solvent vapor annealing to enhance the performance of blue OLEDs**

Yangke Cun<sup>1</sup>, Chen Song<sup>1</sup>, Hua Zheng<sup>2\*</sup>, Juanhong Wang<sup>1</sup>, Chaohuang Mai<sup>1</sup>, Yu Liu<sup>1</sup>,  
Jiali Li<sup>1</sup>, Danmu Yu<sup>1</sup>, Jian Wang<sup>1\*</sup>, Lei Ying<sup>1</sup>, Junbiao Peng<sup>1</sup>, and Yong Cao<sup>1</sup>

<sup>1</sup>Institute of Polymer Optoelectronic Materials and Devices, State Key Laboratory of Luminescent Materials and Devices, South China University of Technology, Guangzhou 510640, China.

<sup>2</sup>School of Electrical Engineering and Intelligentization, Dongguan University of Technology, Dongguan, Guangdong 523808, P. R. China

\*Email - [jianwang@scut.edu.cn](mailto:jianwang@scut.edu.cn)

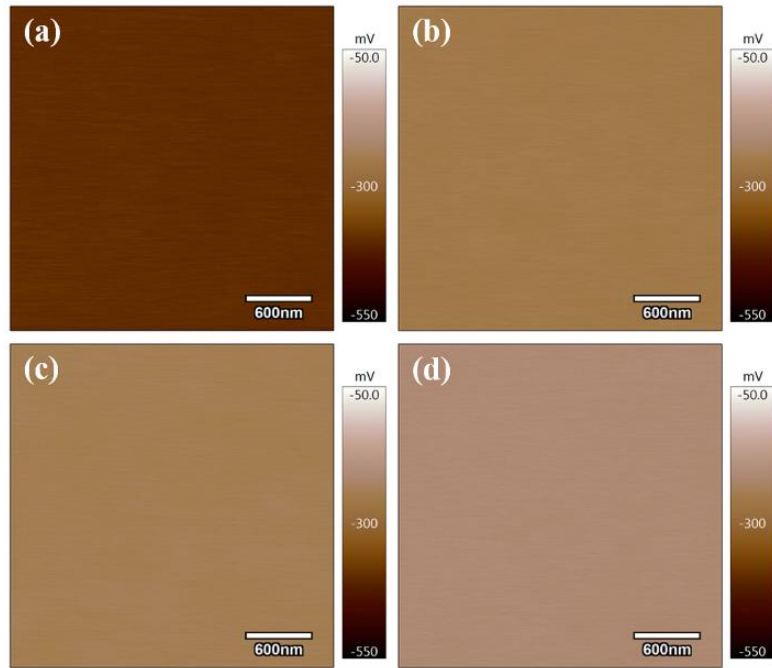

**Figure S1.** The contact potential difference images of films: (a) without solvent vapor annealing, (b) with 90 mins' isopropanol vapor annealing, (c) with 90 mins' ethanol vapor annealing, and (d) with 90 mins' methanol vapor annealing measured by KPFM.

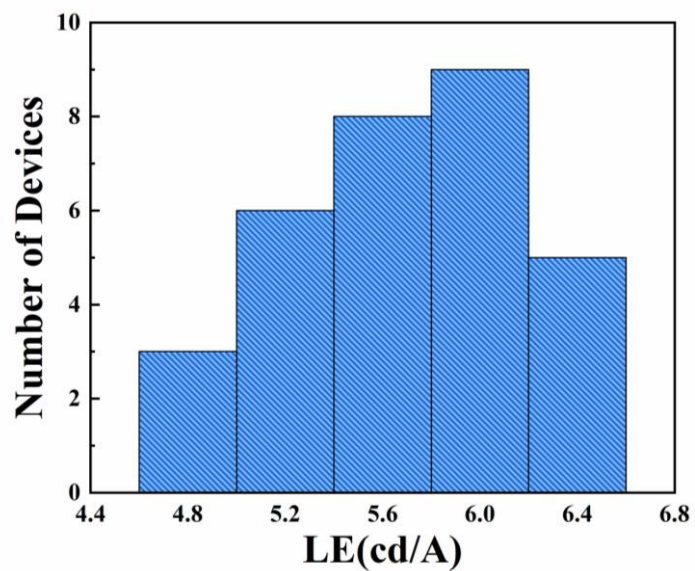

**Figure S2.** The statistical distribution of LE of the devices after 90 mins' SVA.

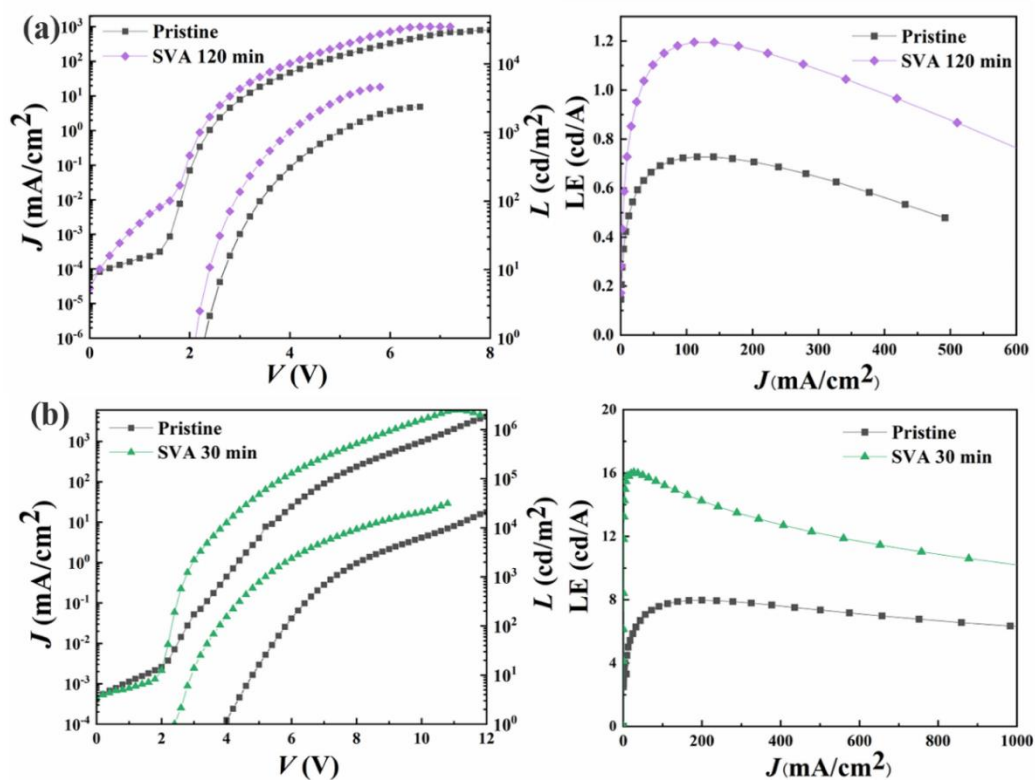

**Figure S3.**  $J$ - $V$ - $L$ , and  $LE$ - $J$  characteristics of (a) MEH-PPV devices with and without methanol vapor annealing, and (b) P-PPV devices with and without methanol vapor annealing.

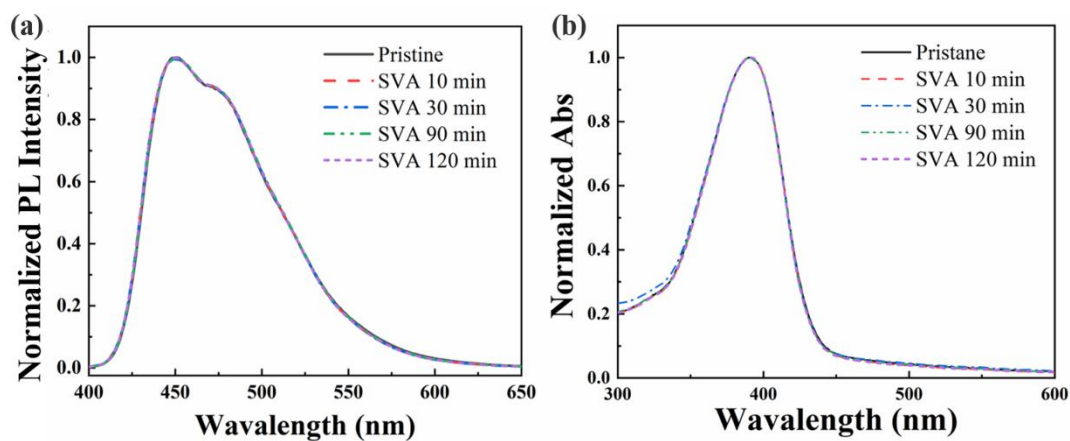

**Figure S4.** (a) Normalized photoluminescence spectra of PFSO films. (b) Normalized UV-vis absorption spectra of PFSO films.

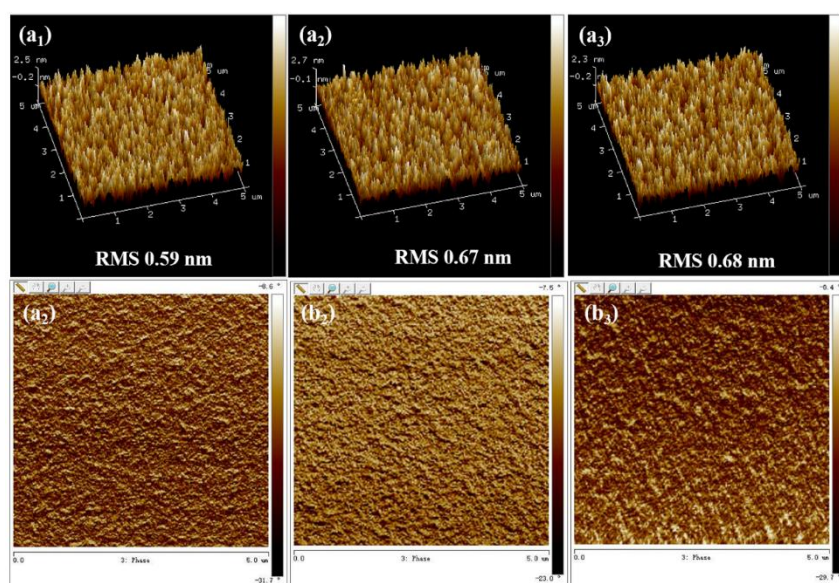

**Figure S5.** AFM images of (a) pristine film, (b) the polymer film after 30 mins' SVA, and (c) the polymer film after 90 mins' SVA. (a1), (b1) and (c1) are the 3D topographic images. (a2), (b2) and (c2) are the phase images.

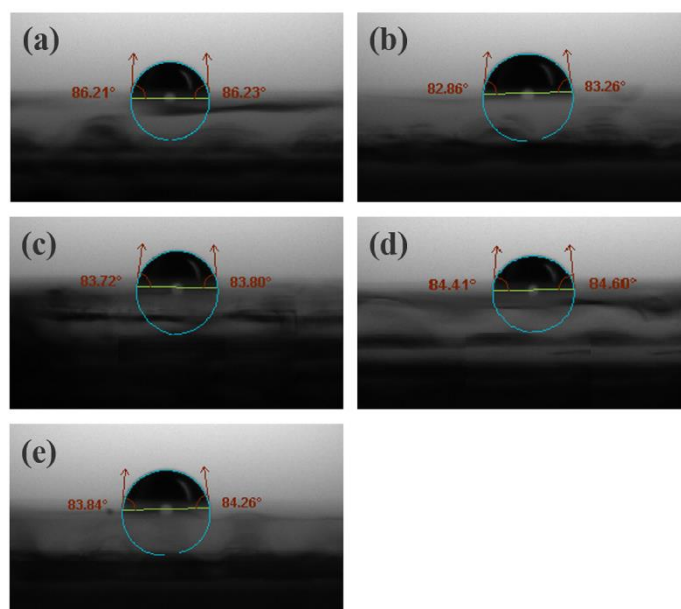

**Figure S6.** The contact angle of the deionized water on PFSO films: (a) without SVA, (b) with 10 mins' SVA, (c) with 30 mins' SVA, (d) with 90 mins' SVA, (e) with 120 mins' SVA.

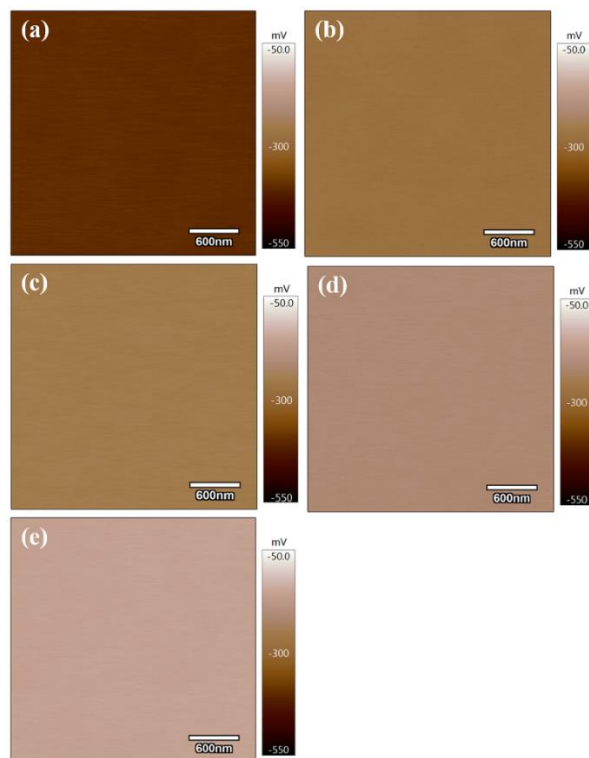

**Figure S7.** The contact potential difference images of films (a) without solvent annealing, (b) with 10 mins, (c) with 30 mins, (d) with 90 mins', (e) with 120 mins' methanol vapor annealing.

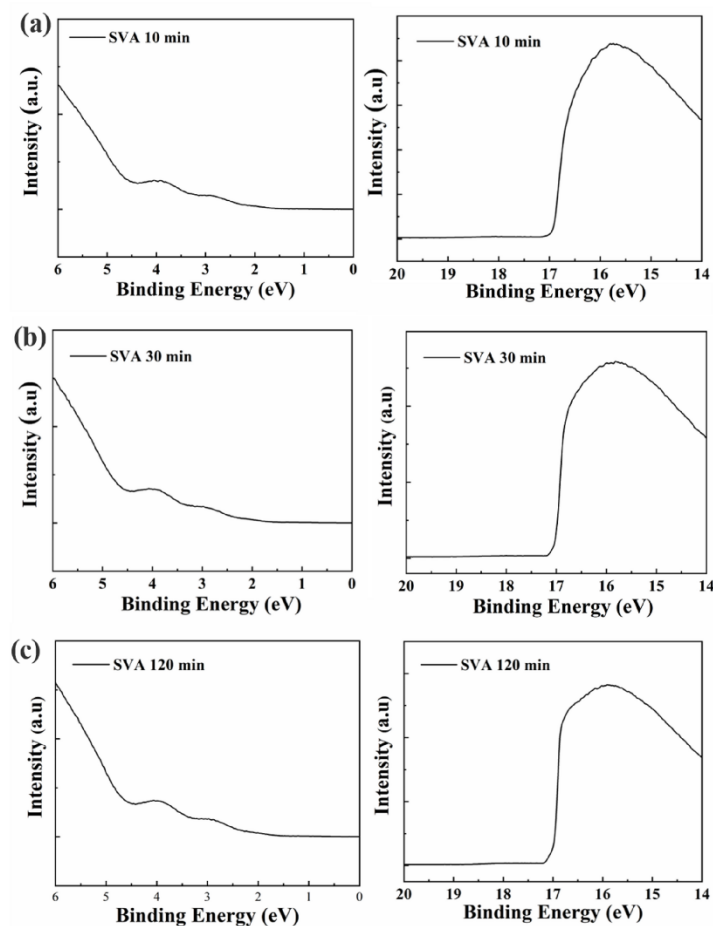

**Figure S8.** UPS spectra of PFSO films: secondary cut-off and offset between WF and IE of the polymer film. (a) Film with 10 mins' SVA. (b) Film with 30 mins' SVA. (c) Film with 120 mins' SVA.

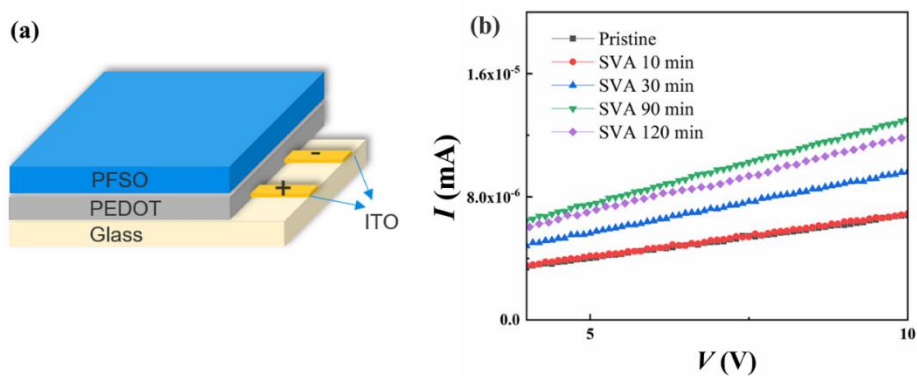

**Figure S9.** (a) Schematic illustration of the “solvent detector.” (b)  $I$ - $V$  characteristics of PEDOT:PSS film before and after SVA treatment.
